# Supplementary material for: “It’s not safe for me and what would it achieve?” Acceptability of patient-referral partner notification for sexually transmitted infections to young people, a mixed methods study from Zimbabwe
Source: PubMed Central journal article supplement — Sex Reprod Health Matters. 2023 Aug 11;31(1):2220188. doi: 10.1080/26410397.2023.2220188 (PMC10424614; doi:10.1080/26410397.2023.2220188), 2023-08-11

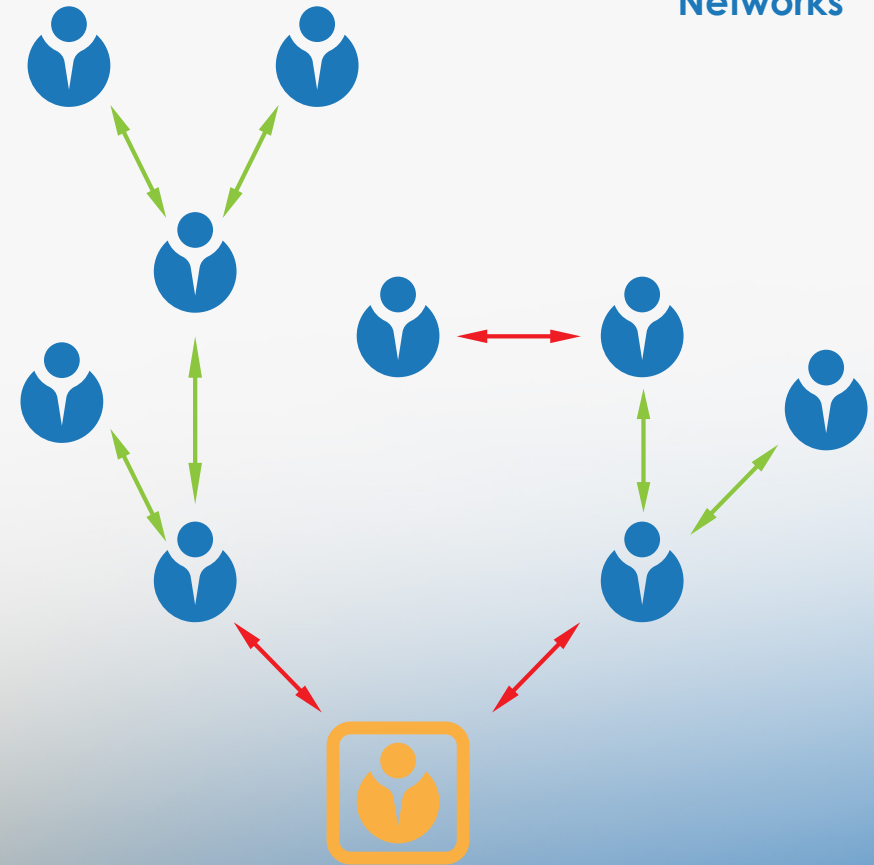

**PARTNER NOTIFICATION TOOLKIT:**  
*Client Facing Worksheets*

## Tool 2: Mapping My Sexual Network

My sexual partners  
in the past  
3 months

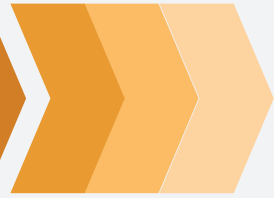

My current  
partners

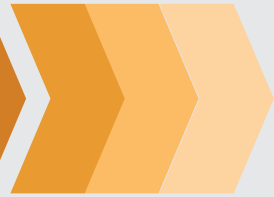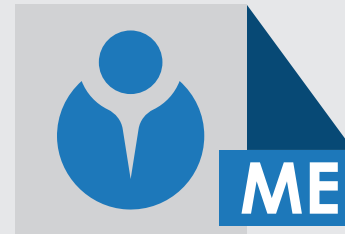

Of your current  
partners, who do  
you think you will  
continue a sexual  
relationship?

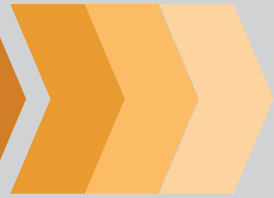

Tool 3: Making a plan, sharing tips, & role playing

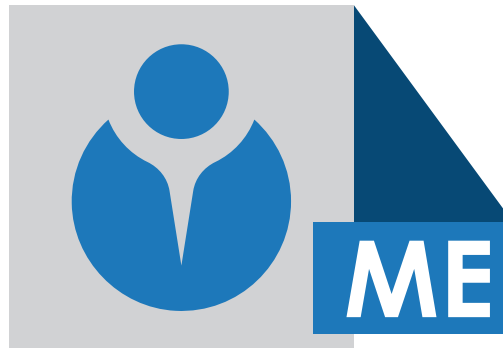

Supplement: ZRHM_A_2220188_SM3109.pdf [file ZRHM_A_2220188_SM3109.pdf]
