# Supplementary material for: “It’s not safe for me and what would it achieve?” Acceptability of patient-referral partner notification for sexually transmitted infections to young people, a mixed methods study from Zimbabwe
Source: PubMed Central journal article supplement — Sex Reprod Health Matters. 2023 Aug 11;31(1):2220188. doi: 10.1080/26410397.2023.2220188 (PMC10424614; doi:10.1080/26410397.2023.2220188), 2023-08-11
Supplement: ZRHM_A_2220188_SM3155.pdf [file ZRHM_A_2220188_SM3155.pdf]

## Where else can I go for STI treatment?

You can take the PN slip to your nearest clinic to access treatment. At the clinic you will have to pay a user fee.

## Is there anything else I need to know?

Condoms offer the best protection against STIs

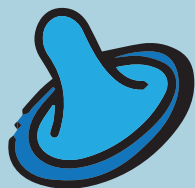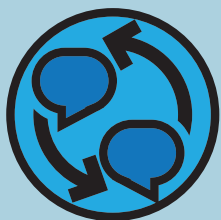

Talk to your sex partner's about STIs. It is important that all your sex partners get treated to prevent re-infection

If you have an STI, it doesn't necessarily mean your current partner/s have cheated. You may have had it for a long time and not know who you got it from.

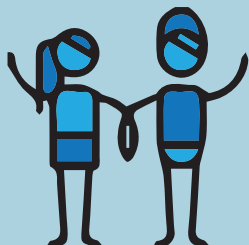

The main thing to remember is, **don't panic**. STIs are common and most can be cured with the right medicine. Come to CHIEDZA or your nearest clinic to find out more.

# UNDERSTANDING STIs

Prevention, treatment & everything in-between!

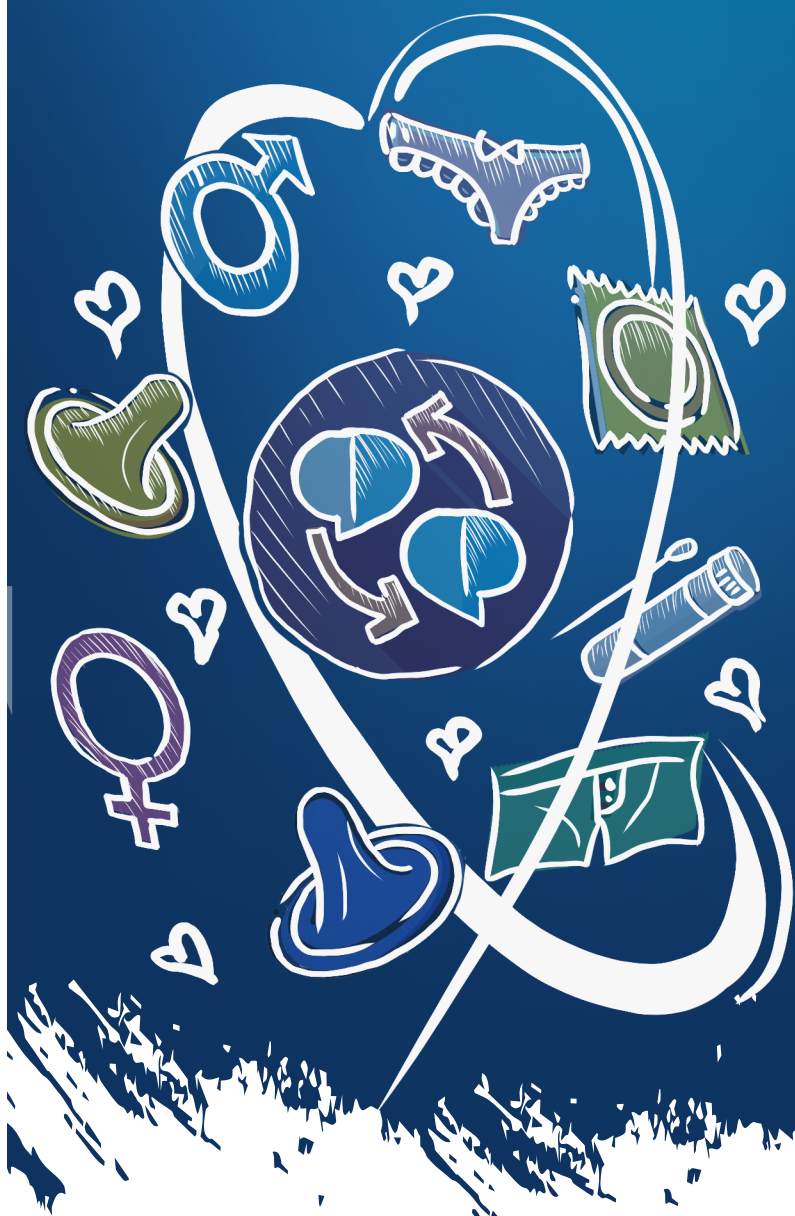

## What are sexually transmitted infections (STIs)?

STIs are infections that can be passed from person to person during:

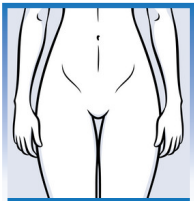

Vaginal sex

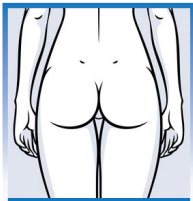

Anal sex

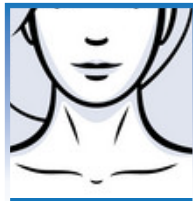

Oral sex

### ! STIs are very common

## How can I reduce my risk of getting an STI?

Using condoms every time you have sex (vaginal, anal, and oral sex) and making sure you use them properly is the best way to protect yourself.

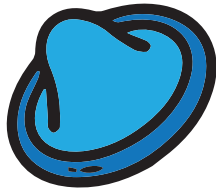

## What are the most common STIs that affect young people?

|                |                |
|----------------|----------------|
| Chlamydia      | Gonorrhoea     |
| Trichomoniasis | Herpes Simplex |

## What are the most common symptoms of STIs?

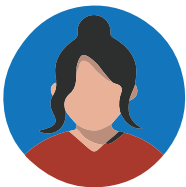

### WOMEN

Abdominal pain  
Discharge from vagina  
Pain when urinating or during sex  
Unusual bleeding patterns  
Unusual sores, ulcers, rashes, or lumps around genitals, anus, groin, or thigh

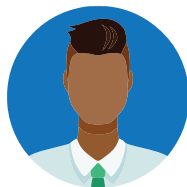

### MEN

Discharge from penis  
Swollen or painful scrotum  
Pain when urinating  
Unusual sores, ulcers, rashes, or lumps around genitals, anus, groin, or thigh

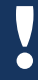

Some STIs have no obvious symptoms, so you or your partner/s could have an STI without knowing.

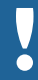

Sometimes symptoms go away, but the infection can stay in your body and cause damage.

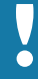

If left untreated, STIs can have long term effects on your health and fertility.

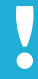

If your partner has been treated for an STI, it is important that you get treated too to avoid re-infection.

## How are STIs treated?

STIs are easily treated with antibiotics. You must get the right medicine from a doctor or nurse to cure the infection. It is important that you take all your medicine and do not share it with anyone else.

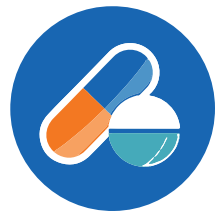

## Where can I get STI treatment?

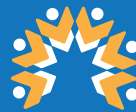

CHIEDZA Anyone who has a PN slip can go to CHIEDZA for treatment.

**Treatment is free!**

There are a lot of reasons to come to CHIEDZA – you don't need to let people know that you are coming to be treated for an STI.

## These are the days and places you can go for treatment at CHIEDZA:

### MONDAY

Pelandaba Hall

### TUESDAY

Nketa Hall

### WEDNESDAY

Tshabalala Hall

### THURSDAY

MMPZ Center, Nkulumane
